# Supplementary material
Source: PubMed Central journal article supplement (PMC9578286)
Supplement: aim-olf-M220760-M22-0760_Supplement.pdf [file aim-olf-M220760-M22-0760_Supplement.pdf]

## Supplementary Material\*

Soni A, Herbert C, Filippaios A, et al. Comparison of rapid antigen tests' performance between Delta and Omicron variants of SARS-CoV-2. A secondary analysis from a serial home self-testing study. *Ann Intern Med.* 2022. [Epub ahead of print]. doi:10.7326/M22-0609

|                                                                                                                    |   |
|--------------------------------------------------------------------------------------------------------------------|---|
| Supplement Table 1: Test Us At Home RT-PCR and Rapid Antigen Testing Schedule                                      | 2 |
| Supplement Table 2: Sequencing Results of Positive RT-PCR Samples                                                  | 2 |
| Supplement Table 3: Distribution of RT-PCR and Ag-RDT test results for different populations used in this analysis | 5 |
| Supplement Table 4: SARS-CoV-2 Results of Population C Participants Who Tested Positive by Rapid Antigen Test      | 6 |

\* This supplementary material was provided by the authors to give readers further details on their article. The material was not copyedited.

**Supplement Table 1: Test Us At Home RT-PCR and Rapid Antigen Testing Schedule**

| Study Day                 | 1 | 2 | 3 | 4 | 5 | 6 | 7 | 8 | 9 | 10 | 11 | 12 | 13 | 14 | 15 |
|---------------------------|---|---|---|---|---|---|---|---|---|----|----|----|----|----|----|
| <b>Rapid Antigen Test</b> | X |   | X |   | X |   | X |   | X |    | X  |    | X  |    | X  |
| <b>RT-PCR Test</b>        | X |   | X |   | X |   | X |   | X |    | X  |    | X  |    |    |

**Supplement Table 2: Sequencing Results of Positive RT-PCR Samples**

| Sample Collection Date | Number of Delta Sequences Reported* | Number of Omicron (BA.1 and BA.1.1) Sequences Reported |
|------------------------|-------------------------------------|--------------------------------------------------------|
| 11/19/2021             | 1                                   | 0                                                      |
| 11/20/2021             | 1                                   | 0                                                      |
| 11/21/2021             | 1                                   | 0                                                      |
| 11/22/2021             | 1                                   | 0                                                      |
| 11/24/2021             | 1                                   | 0                                                      |
| 11/26/2021             | 3                                   | 0                                                      |
| 11/29/2021             | 2                                   | 0                                                      |
| 12/1/2021              | 2                                   | 0                                                      |
| 12/2/2021              | 1                                   | 0                                                      |
| 12/3/2021              | 1                                   | 0                                                      |
| 12/5/2021              | 2                                   | 0                                                      |
| 12/6/2021              | 4                                   | 0                                                      |
| 12/7/2021              | 1                                   | 0                                                      |
| 12/9/2021              | 1                                   | 0                                                      |
| 12/10/2021             | 2                                   | 0                                                      |
| 12/11/2021             | 2                                   | 0                                                      |
| 12/13/2021             | 1                                   | 0                                                      |
| 12/15/2021             | 1                                   | 0                                                      |
| 12/16/2021             | 1                                   | 0                                                      |

|            |   |   |
|------------|---|---|
| 12/17/2021 | 1 | 0 |
| 12/18/2021 | 2 | 0 |
| 12/19/2021 | 1 | 0 |
| 12/20/2021 | 1 | 1 |
| 12/21/2021 | 2 | 0 |
| 12/22/2021 | 1 | 0 |
| 12/23/2021 | 2 | 0 |
| 12/24/2021 | 1 | 1 |
| 12/27/2021 | 3 | 2 |
| 12/28/2021 | 2 | 2 |
| 1/1/2022   | 0 | 1 |
| 1/4/2022   | 0 | 6 |
| 1/5/2022   | 0 | 1 |
| 1/7/2022   | 0 | 1 |
| 1/8/2022   | 0 | 1 |
| 1/9/2022   | 0 | 1 |
| 1/10/2022  | 0 | 9 |
| 1/11/2022  | 0 | 2 |
| 1/12/2022  | 0 | 2 |
| 1/13/2022  | 0 | 2 |
| 1/14/2022  | 0 | 4 |
| 1/15/2022  | 0 | 3 |
| 1/16/2022  | 0 | 8 |
| 1/17/2022  | 0 | 3 |
| 1/18/2022  | 0 | 5 |
| 1/19/2022  | 0 | 6 |
| 1/20/2022  | 0 | 4 |
| 1/21/2022  | 0 | 2 |
| 1/22/2022  | 0 | 2 |
| 1/23/2022  | 0 | 3 |
| 1/24/2022  | 0 | 5 |

|                                                                                                                                        |   |    |
|----------------------------------------------------------------------------------------------------------------------------------------|---|----|
| 1/25/2022                                                                                                                              | 0 | 4  |
| 1/26/2022                                                                                                                              | 0 | 11 |
| 1/27/2022                                                                                                                              | 0 | 14 |
| 1/28/2022                                                                                                                              | 0 | 11 |
| *Delta sequences were of the linages AY.100, AY.103, AY.111, AY.113, AY.114, AY.119, AY.25, AY.25.1, AY.3, AY.3.1, AY.33, AY.39, AY.44 |   |    |

**Supplement Table 3: Distribution of RT-PCR and Ag-RDT test results for different populations used in this analysis**

| <b>Supplemental Table 3: Distribution of RT-PCR and Ag-RDT test results for different populations used in this analysis</b>                                  |                                                   |           |           |                                                               |           |           |                                                         |           |           |                                                                  |          |           |
|--------------------------------------------------------------------------------------------------------------------------------------------------------------|---------------------------------------------------|-----------|-----------|---------------------------------------------------------------|-----------|-----------|---------------------------------------------------------|-----------|-----------|------------------------------------------------------------------|----------|-----------|
| <b>Population</b>                                                                                                                                            | <b>A: First RT-PCR+ observed during the study</b> |           |           | <b>B: First RT-PCR+ followed by a 2nd RT-PCR+ in 48 hours</b> |           |           | <b>C: First RT-PCR+ followed by RT-PCR- in 48 hours</b> |           |           | <b>D: Missing 2nd RT-PCR+ in 48 hours from the first RT-PCR+</b> |          |           |
| <b>Variant</b>                                                                                                                                               | Total                                             | Δ         | O         | Total                                                         | Δ         | O         | Total                                                   | Δ         | O         | Total                                                            | Δ        | O         |
| <b>N</b>                                                                                                                                                     | 207                                               | 58        | 149       | 109                                                           | 27        | 82        | 69                                                      | 22        | 47        | 29                                                               | 9        | 20        |
| <b>Testing days</b>                                                                                                                                          | 1,648                                             | 455       | 1,193     | 866                                                           | 217       | 649       | 554                                                     | 175       | 379       | 228                                                              | 63       | 165       |
| <b>Ag-RDT result in comparison to index RT-PCR+ (n, col%)</b>                                                                                                |                                                   |           |           |                                                               |           |           |                                                         |           |           |                                                                  |          |           |
| Positive same day                                                                                                                                            | 42 (20.3)                                         | 9 (15.5)  | 33 (22.2) | 35 (32.1)                                                     | 7 (25.9)  | 28 (34.2) | 0 (0)                                                   | 0 (0)     | 0 (0)     | 7 (24.1)                                                         | 2 (22.2) | 5 (25.0)  |
| Positive w/in 48hrs                                                                                                                                          | 100 (48.3)                                        | 26 (44.8) | 74 (49.7) | 86 (78.9)                                                     | 22 (81.5) | 64 (78.1) | 1 (1.4)                                                 | 0 (0)     | 1 (2.1)   | 13 (44.8)                                                        | 4 (44.4) | 9 (45.0)  |
| Positive w/in 96hrs                                                                                                                                          | 114 (55.1)                                        | 29 (50.0) | 85 (57.1) | 98 (89.9)                                                     | 25 (92.6) | 73 (89.0) | 3 (4.3)                                                 | 0 (0)     | 3 (6.4)   | 13 (44.8)                                                        | 4 (44.4) | 9 (45.0)  |
| Positive w/in a week                                                                                                                                         | 119 (57.5)                                        | 29 (50.0) | 90 (60.4) | 101 (92.7)                                                    | 25 (92.6) | 76 (92.7) | 5 (7.3)                                                 | 0 (0)     | 5 (10.6)* | 13 (44.8)                                                        | 4 (44.4) | 9 (45.0)  |
| Negative                                                                                                                                                     | 88 (42.5)                                         | 29 (50.0) | 59 (39.6) | 8 (7.3)                                                       | 2 (7.4)   | 6 (7.3)   | 64 (92.8)                                               | 22 (100)  | 42 (89.4) | 16 (55.2)                                                        | 5 (55.6) | 11 (55.0) |
| <b>Lowest RT-PCR+ CT count (n, col%)</b>                                                                                                                     |                                                   |           |           |                                                               |           |           |                                                         |           |           |                                                                  |          |           |
| 10 to <15                                                                                                                                                    | 1 (0.5)                                           | 1 (1.7)   | 0 (0.0)   | 1 (0.9)                                                       | 1 (3.7)   | 0 (0.0)   | 0 (0.0)                                                 | 0 (0.0)   | 0 (0.0)   | 0 (0.0)                                                          | 0 (0.0)  | 0 (0.0)   |
| 15 to <19                                                                                                                                                    | 36 (17.4)                                         | 14 (24.1) | 22 (14.8) | 34 (31.2)                                                     | 14 (51.9) | 20 (24.4) | 1 (1.4)                                                 | 0 (0.0)   | 1 (2.1)   | 1 (3.5)                                                          | 0 (0.0)  | 1 (5.0)   |
| 20 to <25                                                                                                                                                    | 52 (25.1)                                         | 7 (12.1)  | 45 (30.2) | 47 (43.1)                                                     | 6 (22.2)  | 41 (50.0) | 4 (5.8)                                                 | 0 (0.0)   | 4 (8.5)   | 1 (3.5)                                                          | 1 (11.1) | 0 (0.0)   |
| 25 to <30                                                                                                                                                    | 26 (12.6)                                         | 4 (6.9)   | 22 (14.8) | 19 (17.4)                                                     | 3 (11.1)  | 16 (19.5) | 2 (2.9)                                                 | 0 (0.0)   | 2 (4.3)   | 5 (17.2)                                                         | 1 (11.1) | 4 (20.0)  |
| 30 to <35                                                                                                                                                    | 28 (13.5)                                         | 3 (5.2)   | 25 (16.8) | 5 (4.6)                                                       | 1 (3.7)   | 4 (4.9)   | 15 (21.7)                                               | 2 (9.1)   | 13 (27.7) | 8 (27.6)                                                         | 0 (0.0)  | 8 (40.0)  |
| 35+                                                                                                                                                          | 49 (23.7)                                         | 20 (34.5) | 29 (19.5) | 2 (1.8)                                                       | 1 (3.7)   | 1 (1.2)   | 37 (53.6)                                               | 15 (68.2) | 22 (46.8) | 10 (34.5)                                                        | 4 (44.4) | 6 (30.0)  |
| <b>Missing</b>                                                                                                                                               | 15 (7.3)                                          | 9 (15.5)  | 6 (4.0)   | 1 (0.9)                                                       | 1 (3.7)   | 0 (0.0)   | 10 (14.5)                                               | 5 (22.7)  | 5 (10.6)  | 4 (13.8)                                                         | 3 (33.3) | 1 (5.0)   |
| Δ = Delta variant; O = Omicron variant; RT-PCR+ = positive RT-PCR test; RT-PCR- = negative RT-PCR test; Ag-RDT = Rapid Antigen Test                          |                                                   |           |           |                                                               |           |           |                                                         |           |           |                                                                  |          |           |
| *All 5 participants experienced first RT-PCR+ followed by RT-PCR- in 48 hours, but subsequently developed serial RT-PCR positivity later in the study period |                                                   |           |           |                                                               |           |           |                                                         |           |           |                                                                  |          |           |

**Supplement Table 4: SARS-CoV-2 Results of Population C Participants Who Tested Positive by Rapid Antigen Test**

|                                                                     | 1 | 2 | 3 | 4 | 5 | 6 | 7 | 8 | 9 | 10 | 11 | 12 | 13 | 14 | 15 |
|---------------------------------------------------------------------|---|---|---|---|---|---|---|---|---|----|----|----|----|----|----|
| <b>Participant 1:</b>                                               |   |   |   |   |   |   |   |   |   |    |    |    |    |    |    |
| Rapid Antigen Test                                                  | - |   | - |   | - |   | - |   | + |    | +  |    | +  |    | +  |
| RT-PCR Test                                                         | - |   | - |   | + |   | - |   | + |    | +  |    | +  |    |    |
| <b>Participant 2:</b>                                               |   |   |   |   |   |   |   |   |   |    |    |    |    |    |    |
| Rapid Antigen Test                                                  | - |   | - |   | - |   | - |   | + |    | +  |    | +  |    | +  |
| RT-PCR Test                                                         | - |   | + |   | - |   | - |   | + |    | +  |    | +  |    |    |
| <b>Participant 3:</b>                                               |   |   |   |   |   |   |   |   |   |    |    |    |    |    |    |
| Rapid Antigen Test                                                  | - |   | - |   | - |   | - |   | + |    | +  |    | +  |    | +  |
| RT-PCR Test                                                         | - |   | - |   | + |   | - |   | + |    | o  |    | +  |    |    |
| <b>Participant 4:</b>                                               |   |   |   |   |   |   |   |   |   |    |    |    |    |    |    |
| Rapid Antigen Test                                                  | - |   | - |   | - |   | - |   | - |    | -  |    | -  |    | +  |
| RT-PCR Test                                                         | - |   | - |   | - |   | + |   | - |    | +  |    | +  |    |    |
| <b>Participant 5:</b>                                               |   |   |   |   |   |   |   |   |   |    |    |    |    |    |    |
| Rapid Antigen Test                                                  | - |   | - |   | - |   | - |   | + |    | +  |    | +  |    | +  |
| RT-PCR Test                                                         | - |   | + |   | - |   | - |   | + |    | +  |    | +  |    |    |
| <b>“-” = negative test; “+” = positive test; “o” = missing test</b> |   |   |   |   |   |   |   |   |   |    |    |    |    |    |    |
